# Supplementary material for: Evaluation of membrane‐based therapeutic plasma exchange as adjunctive treatment for immune‐mediated hematologic disorders in dogs
Source: PubMed Central journal article supplement — J Vet Intern Med. 2021 Feb 11;35(2):925–35. doi: 10.1111/jvim.16049 (PMC7995402; doi:10.1111/jvim.16049), 2021-02-11

## Supplementary information

Supplementary Figure S1: Cumulative incidence of response to mTPE therapy in dogs with IMHD. The time is counted from the initial presentation (A) or from the day the first mTPE treatment was performed (B). The population is categorized based on the disease, as IMHA (blue) or IMT (green). Cases were censored at their last known follow-up (vertical lines).

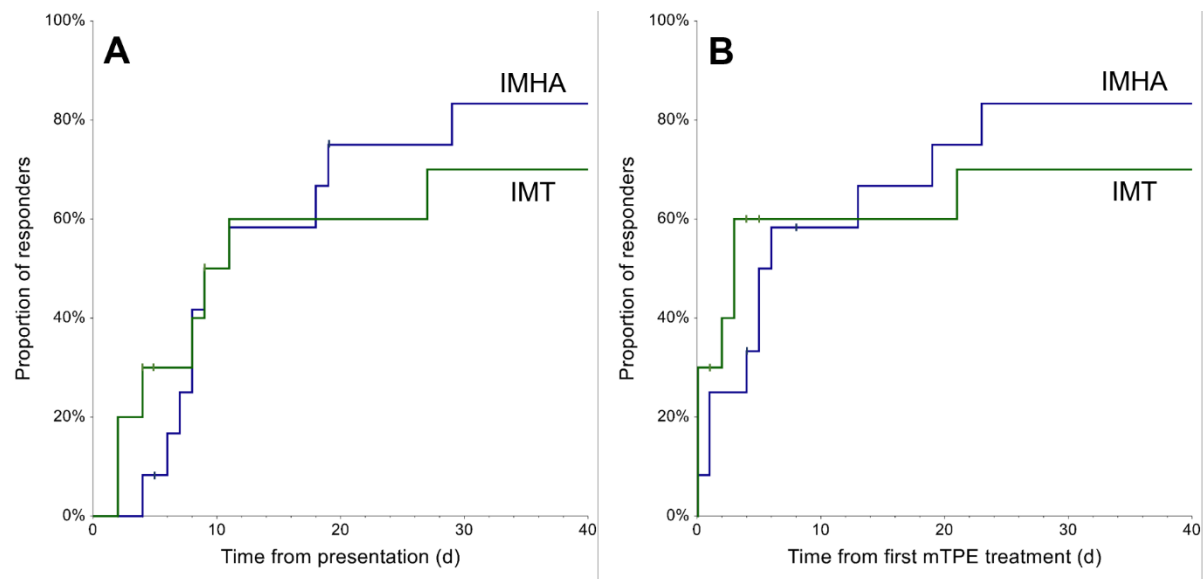

Supplement: JVIM-35-925-s002.pdf [file JVIM-35-925-s002.pdf]
